# Supplementary material for: Photoelectrochemical OER activity by employing BiVO4 with manganese oxide co-catalysts
Source: Royal Society of Chemistry journal article supplement (doi:10.1039/c9cp05293c), 2019-12-04
Supplement: c9cp05293c1.pdf [file c9cp05293c1.pdf]

## Supporting Information

### Photoelectrochemical OER activity by employing BiVO<sub>4</sub> with manganese oxide co-catalysts

Manjodh Kaur, Manjeet Chhetri and C. N. R. Rao\*

New Chemistry Unit, International Centre for Materials Science, School of Advanced Materials and Sheikh Saqr Laboratory, Jawaharlal Nehru Centre for Advanced Scientific Research, Jakkur P.O., Bangalore 560064, India

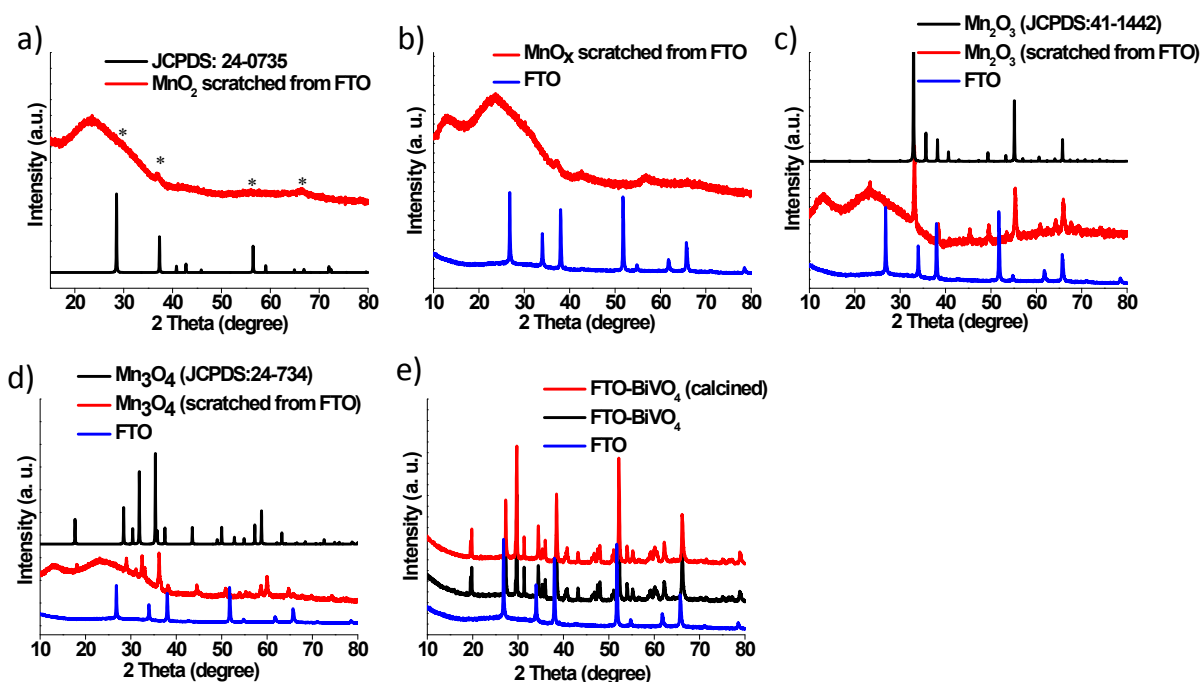

**Fig. S1.** Powder X-ray diffraction matched with ICDD files for a) MnO<sub>2</sub> b) MnO<sub>x</sub>, for comparison FTO pattern is shown as the powder was deposited and scratched from FTO and highlights the absence of scratched SnO<sub>2</sub> c) Mn<sub>2</sub>O<sub>3</sub> d) Mn<sub>3</sub>O<sub>4</sub> e) FTO-BiVO<sub>4</sub> was heated at 600 °C and no change in the diffraction pattern was observed in comparison to the unannealed FTO-BiVO<sub>4</sub>.

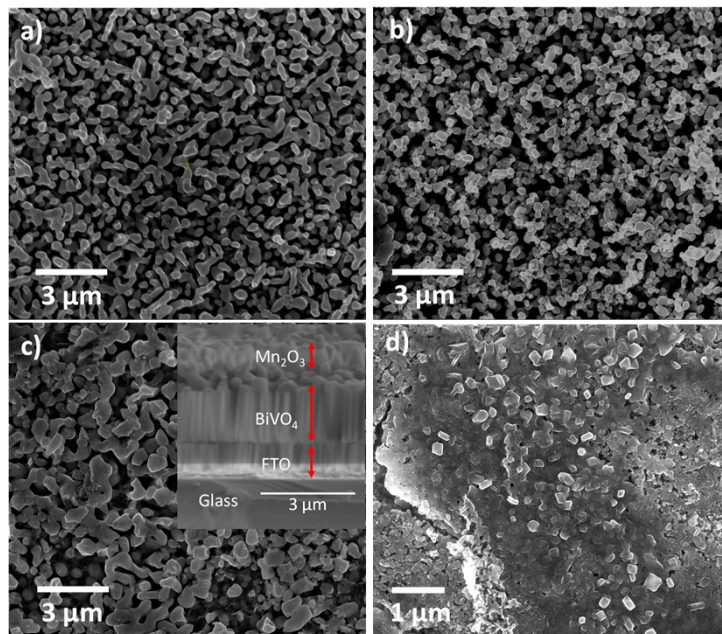

**Fig. S2.** FESEM top view of the electrode for a) FTO-BiVO<sub>4</sub> b) FTO-BiVO<sub>4</sub>-MnO<sub>2</sub> c) FTO-BiVO<sub>4</sub>-Mn<sub>2</sub>O<sub>3</sub> (inset image showing cross-section of FTO-BiVO<sub>4</sub>-Mn<sub>2</sub>O<sub>3</sub> showing the electrodeposition of different layers d) FTO-BiVO<sub>4</sub>-Mn<sub>3</sub>O<sub>4</sub>.

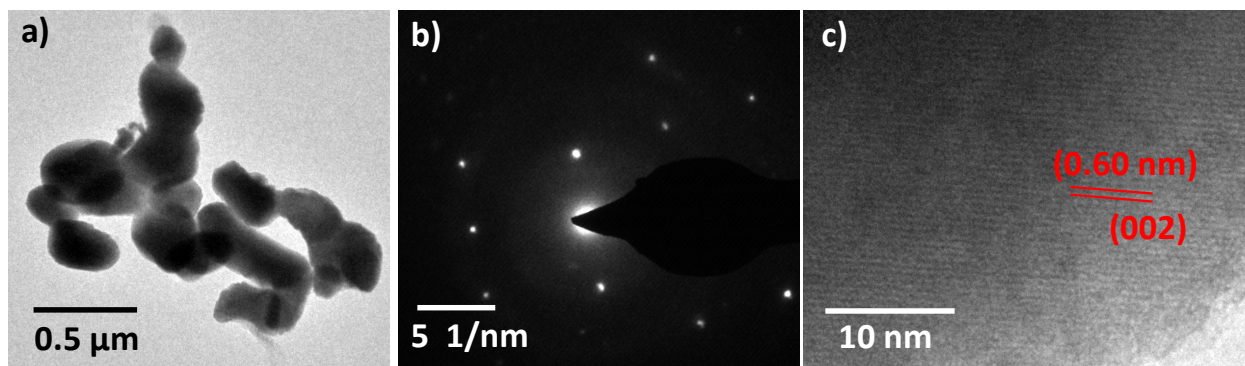

**Fig. S3.** a) TEM images for BiVO<sub>4</sub> scratched from FTO b) SAED pattern showing the crystalline nature of the BiVO<sub>4</sub> c) HRTEM image of BiVO<sub>4</sub> showing lattice fringe for the plane (002).

Note: Transmission electron microscopy (TEM) of BiVO<sub>4</sub> has shown the presence of particles of size range 0.5-1 μm. Small area electron diffraction (**Fig. S3b**) signifies the crystalline nature and HRTEM (**Fig. S3c**) reveals the presence of lattice fringes corresponding to the plane (002).

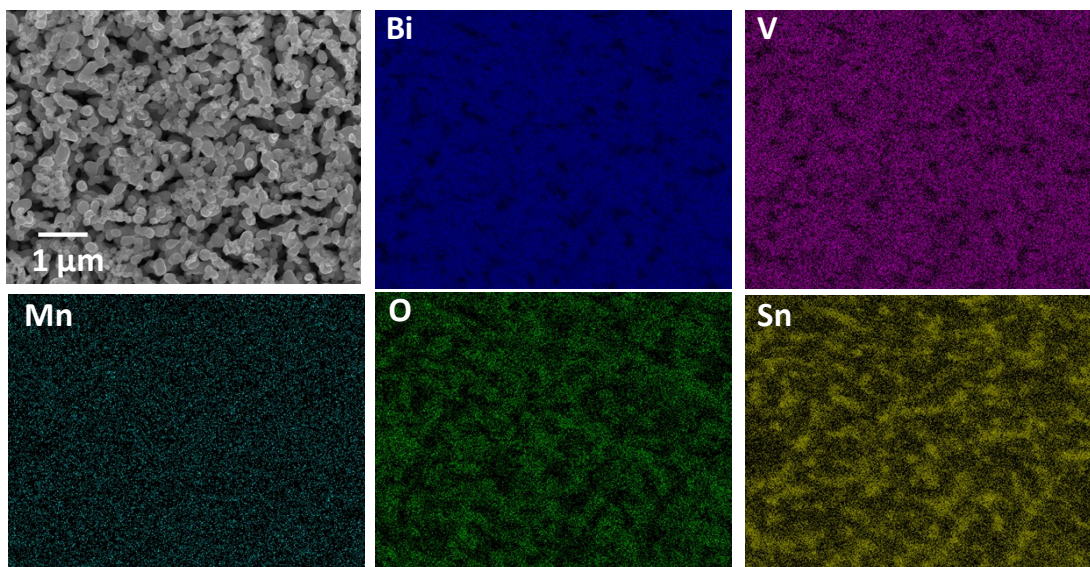

**Fig. S4.** Elemental mapping of top surface of FTO-BiVO<sub>4</sub>-MnO<sub>x</sub> showing uniform distribution of elements Bi, V, Sn, Mn, O and C.  
 Note: Elemental mapping of top view of FTO-BiVO<sub>4</sub>-MnO<sub>x</sub> studies show has highlighted the uniform distribution of the Bi, V, Mn, O, C and Sn elements on the electrode surface.

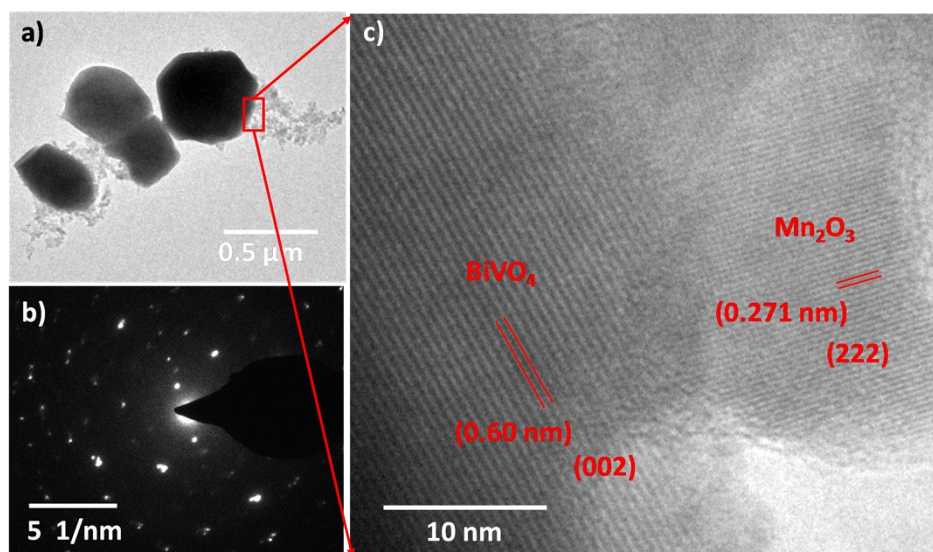

**Fig S5.** a) TEM images for BiVO<sub>4</sub>-Mn<sub>2</sub>O<sub>3</sub> scratched from FTO b) SAED pattern showing the crystalline nature of the BiVO<sub>4</sub> depicted by big spots and small spots correspond to Mn<sub>2</sub>O<sub>3</sub> c) HRTEM image of BiVO<sub>4</sub> showing lattice fringe in close proximity of lattice fringe of Mn<sub>2</sub>O<sub>3</sub> and their respective lattice fringes with interplanar spacing of 0.60 nm (002) and 0.27 nm (222) for BiVO<sub>4</sub> and Mn<sub>2</sub>O<sub>3</sub> respectively.

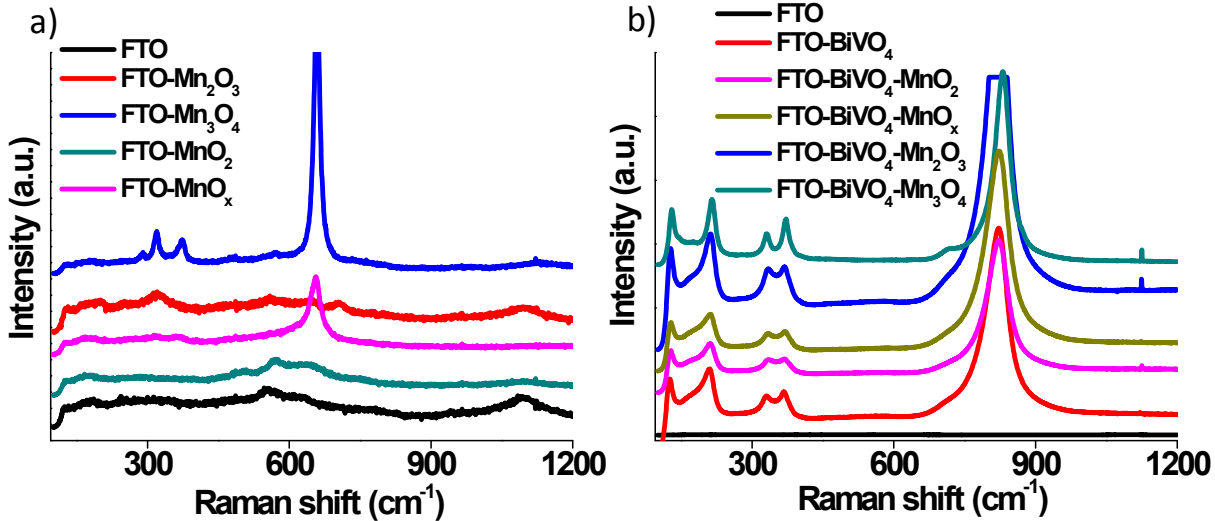

**Fig S6.** Raman analyses for a) deposited Manganese oxides on FTO b) deposited Manganese oxides on FTO-BiVO<sub>4</sub>.

Note: Raman analyses (**Fig. S6a**) for MnO<sub>2</sub> shows weak peaks at 503, 570, 644 and 756 cm<sup>-1</sup>, raman modes at 570 cm<sup>-1</sup> and 644 cm<sup>-1</sup> corresponds to the A<sub>g</sub> breathing vibrations of MnO<sub>6</sub> octahedra in the structure.<sup>1</sup> Raman analysis of Mn<sub>2</sub>O<sub>3</sub> (**Fig. S6a**) depicts peaks at 321, 559, 650 and 707 cm<sup>-1</sup> corresponds to the vibrational modes corresponding to out of plane symmetric and asymmetric vibrations of Mn-O-Mn species.<sup>2</sup> In the case of Mn<sub>3</sub>O<sub>4</sub> (**Fig. S6a**) characteristic band is observed at 655 cm<sup>-1</sup> in addition to other vibration modes at 289, 321, 372, 483, 572 cm<sup>-1</sup>. The band at 655 cm<sup>-1</sup> corresponds to A<sub>1g</sub> mode of vibration of Mn-O breathing vibrations of Mn<sup>2+</sup> in tetrahedral coordination which supports the presence of Mn<sub>3</sub>O<sub>4</sub> phase of Mn oxide.<sup>3</sup> Mn<sub>3</sub>O<sub>4</sub> is obtained by heat treatment at 600 °C from the MnO<sub>2</sub>. The heat treatment helps in the intercalation of Mn<sup>2+</sup> ions in the tetrahedral sites and results in phase transformation of MnO<sub>2</sub> to Mn<sub>3</sub>O<sub>4</sub>.<sup>4</sup> Whereas, the Raman spectra of MnO<sub>x</sub> (**Fig. S6a**) shows vibration modes at 321, 650 and 707 cm<sup>-1</sup> which are matching with the peak both from the Mn<sub>2</sub>O<sub>3</sub> and Mn<sub>3</sub>O<sub>4</sub> and clearly signifies the mixed phase nature of the material i.e. a combination of Mn<sup>3+</sup> and Mn<sup>4+</sup> oxidation states. Typical vibrations corresponding to the BiVO<sub>4</sub> are observed at 129, 210, 330, 366, 702 and 820 cm<sup>-1</sup> as shown in **Fig. S6b**. Bands at 330 and 366 cm<sup>-1</sup> depict the asymmetric and symmetric formations of VO<sub>4</sub> tetrahedron. Raman bands centred at 702 and 820 cm<sup>-1</sup> indicate the two vibrational modes of V-O bonds. With addition of Mn oxides and annealing at different temperatures, shift in the peaks of electrodeposited BiVO<sub>4</sub> is observed due to the change in the

electronic environment by electrodeposition of the Mn oxides.<sup>5</sup> The peaks corresponding to different Mn oxides on the BiVO<sub>4</sub> were not observed clearly in **Fig. S6b** due to high intensity signals of BiVO<sub>4</sub> due to lesser deposition of respective Mn oxides.

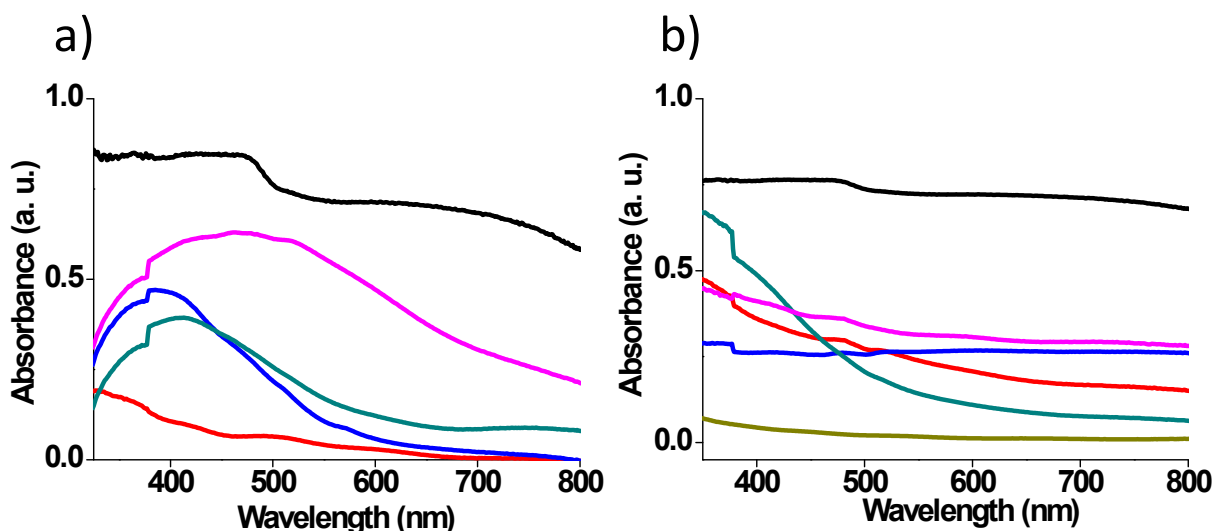

**Fig. S7.** a) UV-vis absorption spectra of electrodeposited Mn oxides, FTO-BiVO<sub>4</sub> (black line), FTO-MnO<sub>2</sub> (green line), FTO-MnO<sub>x</sub> (pink line), FTO-Mn<sub>2</sub>O<sub>3</sub> (red line), FTO-Mn<sub>3</sub>O<sub>4</sub> (blue line) b) UV-vis absorption spectra of electrodeposited Mn oxides on FTO-BiVO<sub>4</sub> (black line), FTO-BiVO<sub>4</sub>-MnO<sub>2</sub> (green), FTO-BiVO<sub>4</sub>-MnO<sub>x</sub> (pink), FTO-BiVO<sub>4</sub>-Mn<sub>2</sub>O<sub>3</sub> (red), FTO-BiVO<sub>4</sub>-Mn<sub>3</sub>O<sub>4</sub> (blue).

Note: FTO-MnO<sub>x</sub> showed broad absorption edge highlighting the presence of mixture of oxides in its composition. FTO-MnO<sub>2</sub> shows broad absorption edge in the range of 411-560 nm owing to the possible d-d transitions in the lower t<sub>2g</sub> and higher e<sub>g</sub> energy levels in the ligand field of MnO<sub>6</sub> octahedra.<sup>6</sup> FTO-Mn<sub>2</sub>O<sub>3</sub> has shown absorption edges at 360, 423 and 512 nm. Absorption at 360 nm is the characteristic of the presence of Mn<sup>+3</sup> ions in the sample.<sup>7</sup> Broad absorption peaks are observed at 417, 510 and 571 nm for FTO-Mn<sub>3</sub>O<sub>4</sub> relating to the Jahn–Teller (J–T) distorted d-d transitions possible in the structure and band gap plots are shown in **Fig. S7a**.<sup>8</sup> The absorption spectra of deposition of Mn oxides on the FTO-BiVO<sub>4</sub> were recorded (**Fig. S7b**). The absorption spectra of the films showed broad absorption range of 443-668 nm and 452-648 nm in the case of FTO-BiVO<sub>4</sub>-MnO<sub>x</sub> and FTO-BiVO<sub>4</sub>-Mn<sub>2</sub>O<sub>3</sub> respectively. This indicated that the photoanodes are suitable for visible light absorption and have the required band gaps of 2.5-2.6 eV as shown in **Fig. S7**. A sharp fall in the absorbance was obtained in the range of 400-518 nm for FTO-BiVO<sub>4</sub>-MnO<sub>2</sub> corresponding to the band gap of 2.49 eV. Band gap of 2.25 eV was

obtained for FTO-BiVO<sub>4</sub>-Mn<sub>3</sub>O<sub>4</sub> owing to the weak absorption edges at 413, 484 and 604 nm. Band gap plots have been shown on **Figure S8, S9** and the values are tabulated in **Table S1**. Band gaps have been calculated using the Tauc plots using the relation:

$$\alpha h\nu = A (h\nu - E_g)^n$$

where,  $\alpha$  is the absorption coefficient (cm<sup>-1</sup>),  $h\nu$  is the photon energy (eV),  $A$  is the constant,  $E_g$  is the band gap (eV) and  $n$  determines the type of transition and has value  $\frac{1}{2}$ ,  $\frac{3}{2}$ , 2 and 3 for direct allowed, direct forbidden transition, indirect allowed and indirect forbidden transition, respectively.

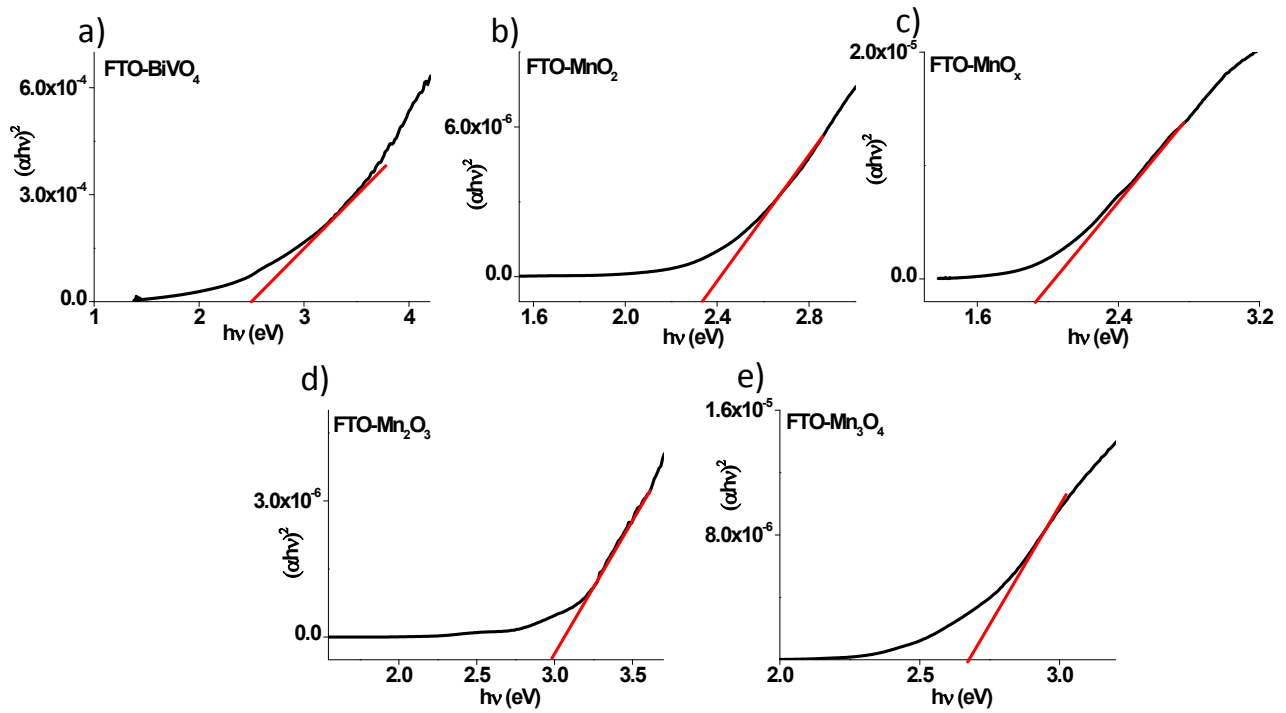

**Fig. S8.** Band gap plots from Tauc relations are shown for a) FTO-BiVO<sub>4</sub> b) FTO-MnO<sub>2</sub> c) FTO-MnO<sub>x</sub> d) FTO-Mn<sub>2</sub>O<sub>3</sub> e) FTO-Mn<sub>3</sub>O<sub>4</sub>.

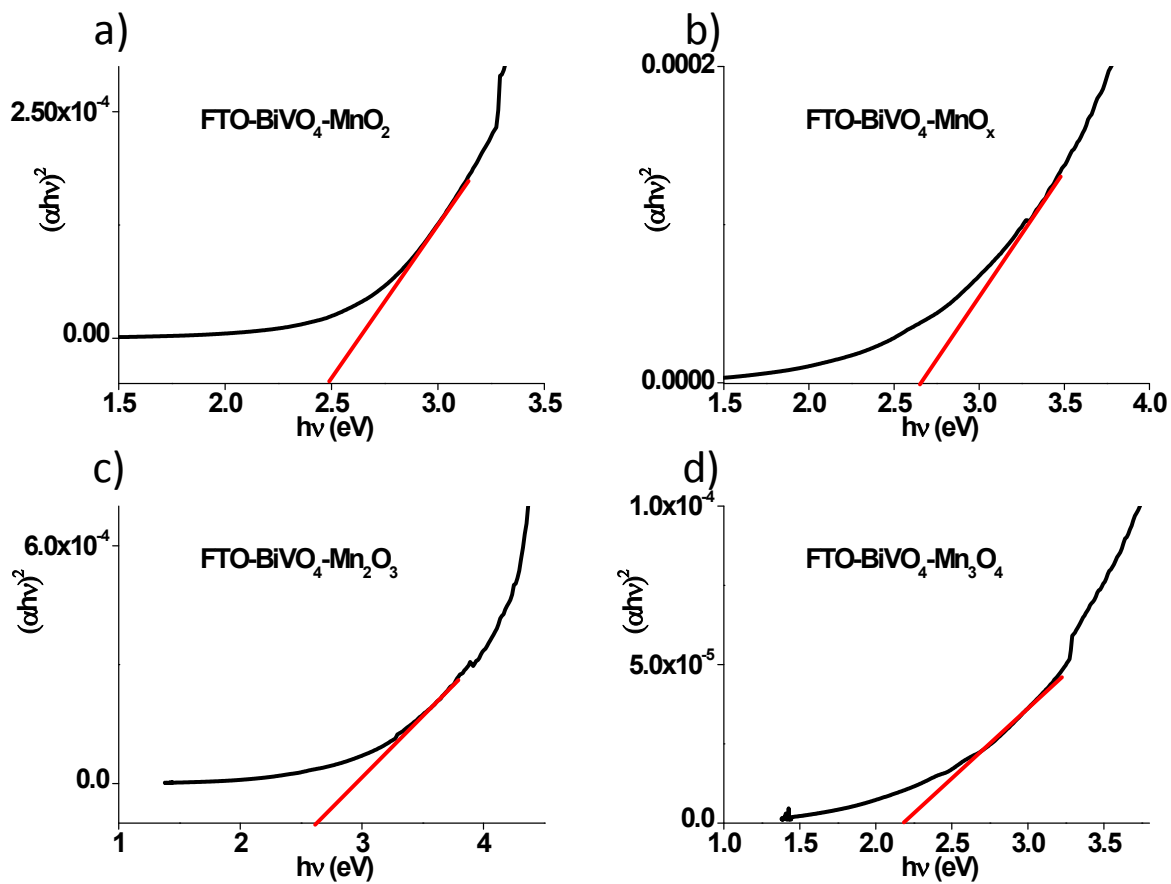

**Fig. S9.** Band gap plots from Tauc relations are shown for a) FTO-BiVO<sub>4</sub>-MnO<sub>2</sub> b) FTO-BiVO<sub>4</sub>-MnO<sub>x</sub> c) FTO-BiVO<sub>4</sub>-Mn<sub>2</sub>O<sub>3</sub> d) FTO-BiVO<sub>4</sub>-Mn<sub>3</sub>O<sub>4</sub>.

**Table S1.** Band gap values obtained from Tauc plot:

| <b>Compound</b>                                         | <b>Band Gaps from Tauc plots (eV)</b> |
|---------------------------------------------------------|---------------------------------------|
| <b>FTO-BiVO<sub>4</sub></b>                             | <b>2.64</b>                           |
| <b>FTO-MnO<sub>2</sub></b>                              | <b>2.34</b>                           |
| <b>FTO-Mn<sub>2</sub>O<sub>3</sub></b>                  | <b>2.99</b>                           |
| <b>FTO-MnO<sub>x</sub></b>                              | <b>1.87</b>                           |
| <b>FTO-Mn<sub>3</sub>O<sub>4</sub></b>                  | <b>2.63</b>                           |
| <b>FTO-BiVO<sub>4</sub>-MnO<sub>2</sub></b>             | <b>2.49</b>                           |
| <b>FTO-BiVO<sub>4</sub>-Mn<sub>2</sub>O<sub>3</sub></b> | <b>2.51</b>                           |
| <b>FTO-BiVO<sub>4</sub>-MnO<sub>x</sub></b>             | <b>2.65</b>                           |
| <b>FTO-BiVO<sub>4</sub>-Mn<sub>3</sub>O<sub>4</sub></b> | <b>2.25</b>                           |

**Table S2.** XPS deconvoluted peaks for Mn and Bi summarised:

| <b>Compound</b>                                         | <b>Mn2p (eV)</b>        |                         | <b>Bi4f (eV)</b>        |                         |
|---------------------------------------------------------|-------------------------|-------------------------|-------------------------|-------------------------|
|                                                         | <b>2p<sub>3/2</sub></b> | <b>2p<sub>1/2</sub></b> | <b>4f<sub>7/2</sub></b> | <b>4f<sub>5/2</sub></b> |
| <b>FTO-BiVO<sub>4</sub></b>                             | -                       | -                       | <b>158.58</b>           | <b>163.84</b>           |
| <b>FTO-BiVO<sub>4</sub>-MnO<sub>2</sub></b>             | <b>642.90</b>           | <b>654.43</b>           | <b>159.07</b>           | <b>164.33</b>           |
| <b>FTO-BiVO<sub>4</sub>-MnO<sub>x</sub>-before PEC</b>  | <b>641.52/644</b>       | <b>653.42</b>           | <b>158.61</b>           | <b>163.96</b>           |
| <b>FTO-BiVO<sub>4</sub>-MnO<sub>x</sub>-after PEC</b>   | <b>641.52/643.45</b>    | <b>654.16</b>           | <b>159.12</b>           | <b>164.40</b>           |
| <b>FTO-BiVO<sub>4</sub>-Mn<sub>2</sub>O<sub>3</sub></b> | <b>641.60</b>           | <b>653.17</b>           | <b>157.92</b>           | <b>163.20</b>           |
| <b>FTO-BiVO<sub>4</sub>-Mn<sub>3</sub>O<sub>4</sub></b> | <b>639.03/641.98</b>    | <b>653.12</b>           | <b>158.64</b>           | <b>163.93</b>           |



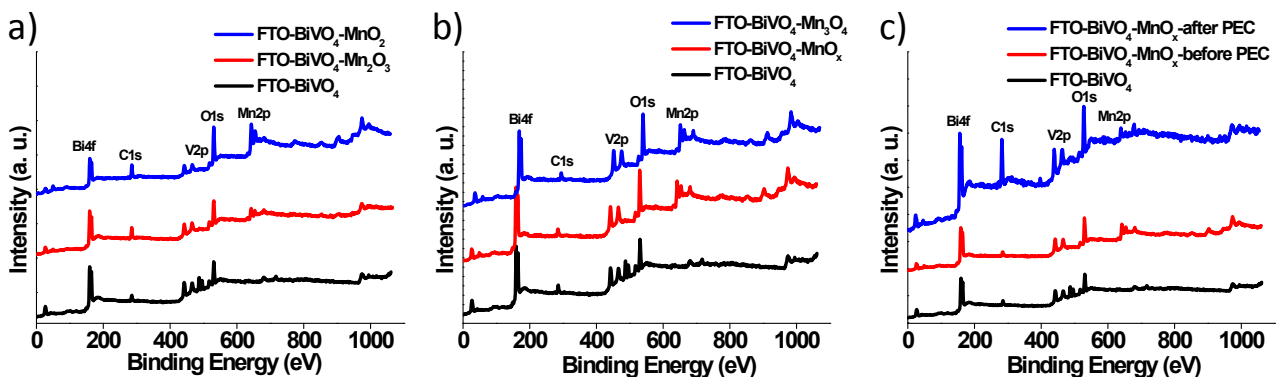

**Fig. S10.** X-ray photoelectron survey scan spectra for a) FTO-BiVO<sub>4</sub>, FTO-BiVO<sub>4</sub>-MnO<sub>2</sub> and FTO-BiVO<sub>4</sub>-Mn<sub>2</sub>O<sub>3</sub> b) FTO-BiVO<sub>4</sub>, FTO-BiVO<sub>4</sub>-MnO<sub>x</sub> and FTO-BiVO<sub>4</sub>-Mn<sub>3</sub>O<sub>4</sub> c) FTO-BiVO<sub>4</sub>, FTO-BiVO<sub>4</sub>-MnO<sub>x</sub> before Photoelectrochemical water splitting (PEC) and FTO-BiVO<sub>4</sub>-MnO<sub>x</sub> after PEC.

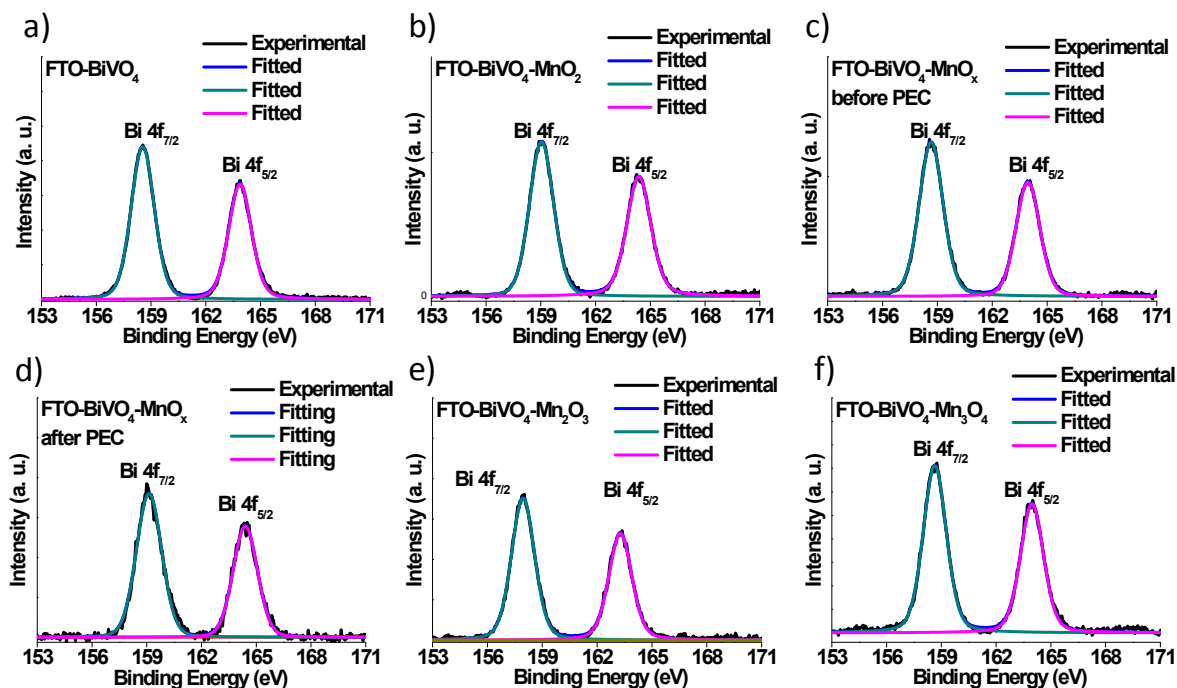

**Fig. S11.** Deconvoluted peaks of Bi 4f<sub>7/2</sub> and Bi 4f<sub>5/2</sub> for a) FTO-BiVO<sub>4</sub> b) FTO-BiVO<sub>4</sub>-MnO<sub>2</sub> c) FTO-BiVO<sub>4</sub>-MnO<sub>x</sub> before Photoelectrochemical water splitting (PEC) d) FTO-BiVO<sub>4</sub>-MnO<sub>x</sub> after PEC e) FTO-BiVO<sub>4</sub>-Mn<sub>2</sub>O<sub>3</sub> f) FTO-BiVO<sub>4</sub>-Mn<sub>3</sub>O<sub>4</sub>.

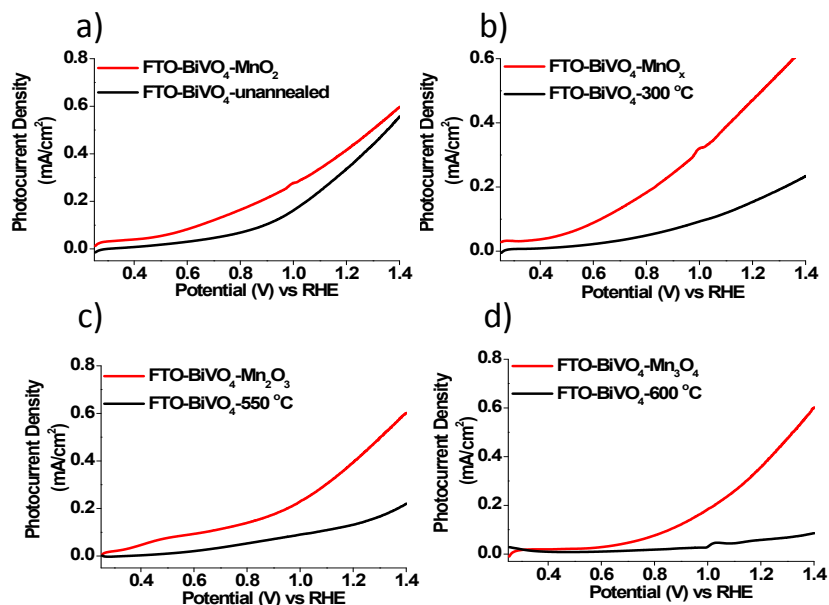

**Fig. S12.** Photocurrent density (J) vs Potential (V) vs RHE curves for full light illumination for a) FTO-BiVO<sub>4</sub>-MnO<sub>2</sub> compared with unannealed BiVO<sub>4</sub> b) FTO-BiVO<sub>4</sub>-MnO<sub>x</sub> compared with BiVO<sub>4</sub> annealed at 300 °C c) FTO-BiVO<sub>4</sub>-Mn<sub>2</sub>O<sub>3</sub> compared with BiVO<sub>4</sub> annealed at 550 °C d) FTO-BiVO<sub>4</sub>-Mn<sub>3</sub>O<sub>4</sub> compared with BiVO<sub>4</sub> annealed at 600 °C under visible light illumination of 100 mW/cm<sup>2</sup> in 0.1 M Potassium phosphate (KPi) buffer solution (pH=7).

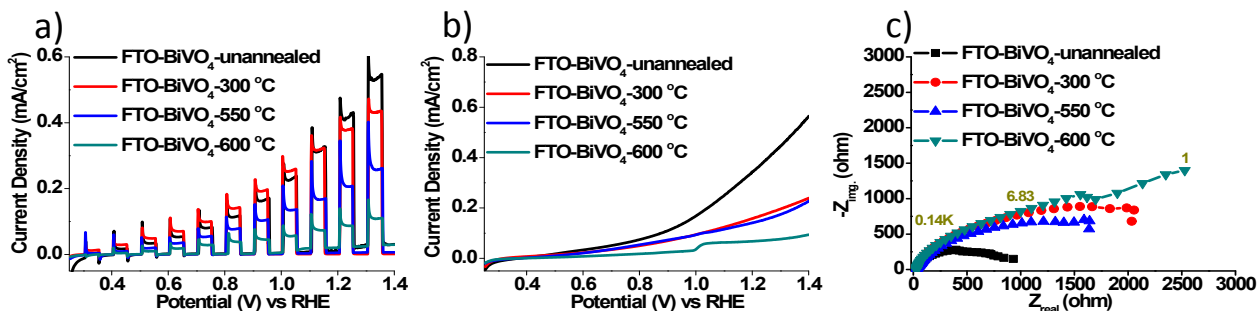

**Fig. S13.** a) Comparison of J-V curves for chopped light illumination for FTO-BiVO<sub>4</sub> unannealed with the FTO-BiVO<sub>4</sub> annealed at 300 °C, 550 °C and 600 °C b) Comparison of J-V curves for full light illumination for FTO-BiVO<sub>4</sub> unannealed with the FTO-BiVO<sub>4</sub> annealed at 300 °C, 550 °C and 600 °C c) Comparison of Nyquist plots of FTO-BiVO<sub>4</sub> unannealed with the FTO-BiVO<sub>4</sub> annealed at 300 °C, 550 °C and 600 °C, the numerical values (dark yellow font) in the plots represent the respective frequencies of the three data points below them, under visible light illumination of 100 mW/cm<sup>2</sup> in 0.1 M Potassium phosphate (KPi) buffer solution (pH=7).

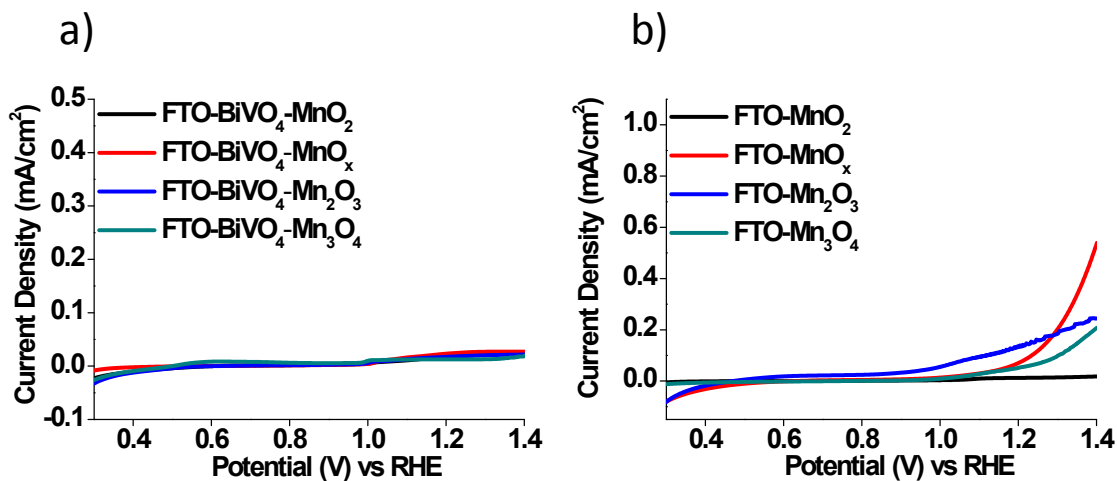

**Fig. S14.** Current density (J) vs Potential (V) vs RHE curves for a) FTO-BiVO<sub>4</sub>-MnO<sub>2</sub>, FTO-BiVO<sub>4</sub>-MnO<sub>x</sub>, FTO-BiVO<sub>4</sub>-Mn<sub>2</sub>O<sub>3</sub> and FTO-BiVO<sub>4</sub>-Mn<sub>3</sub>O<sub>4</sub> in dark in 0.1 M Potassium phosphate (KPi) buffer solution (pH=7) b) in full light illumination for FTO-MnO<sub>2</sub>, FTO-MnO<sub>x</sub>, FTO-Mn<sub>2</sub>O<sub>3</sub> and FTO-Mn<sub>3</sub>O<sub>4</sub> in 0.1 M Potassium phosphate (KPi) buffer solution (pH=7).

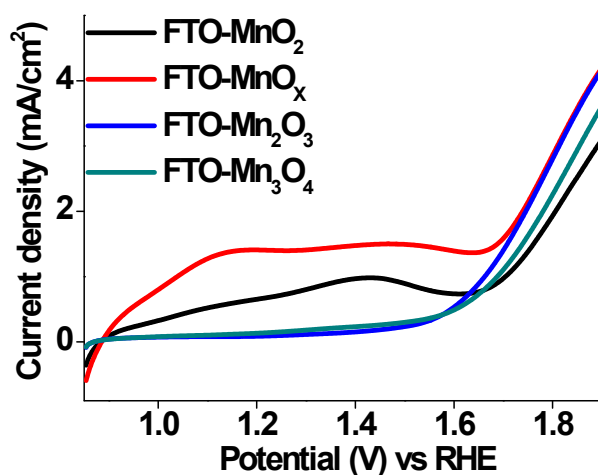

**Fig. S15.** Comparison of Current Density (J) as a function of potential (V) vs RHE of FTO-MnO<sub>2</sub>, FTO-MnO<sub>x</sub>, FTO-Mn<sub>2</sub>O<sub>3</sub>, FTO-Mn<sub>3</sub>O<sub>4</sub> in 0.1 M Potassium phosphate (KPi) buffer solution (pH=7).

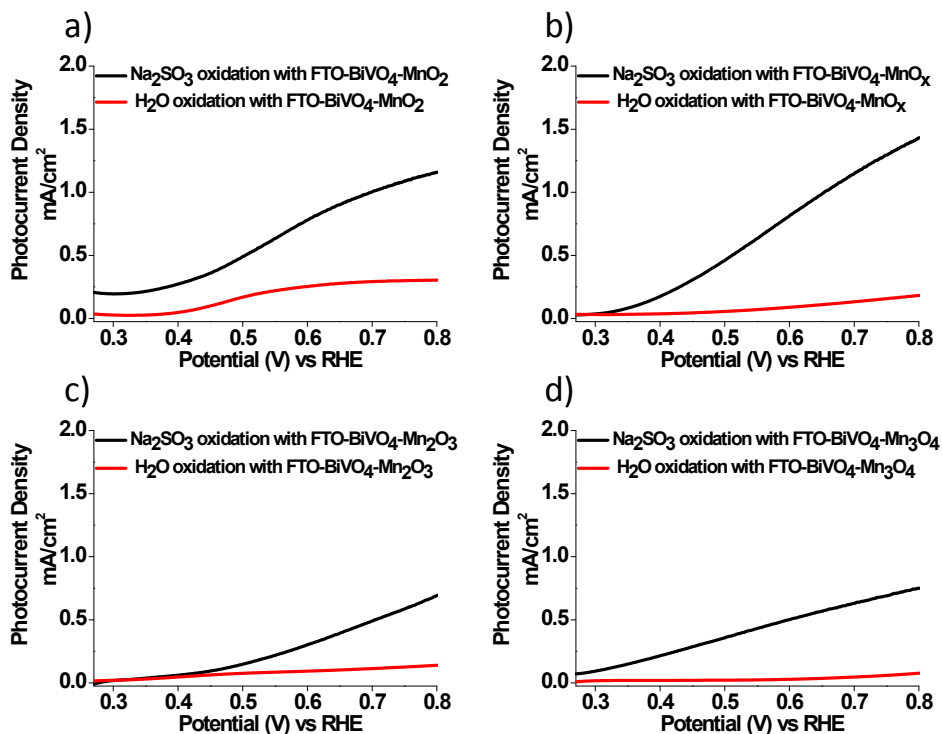

**Fig. S16.** Photocurrent density (J) vs Potential (V) (vs RHE) plots for Na<sub>2</sub>SO<sub>3</sub> vs H<sub>2</sub>O oxidation for a) FTO-BiVO<sub>4</sub>-MnO<sub>2</sub> b) FTO-BiVO<sub>4</sub>-MnO<sub>x</sub> c) FTO-BiVO<sub>4</sub>-Mn<sub>2</sub>O<sub>3</sub> d) FTO-BiVO<sub>4</sub>-Mn<sub>3</sub>O<sub>4</sub> under visible light illumination of 100 mW/cm<sup>2</sup> in 0.1 M Potassium phosphate (KPi) buffer solution (pH=7).

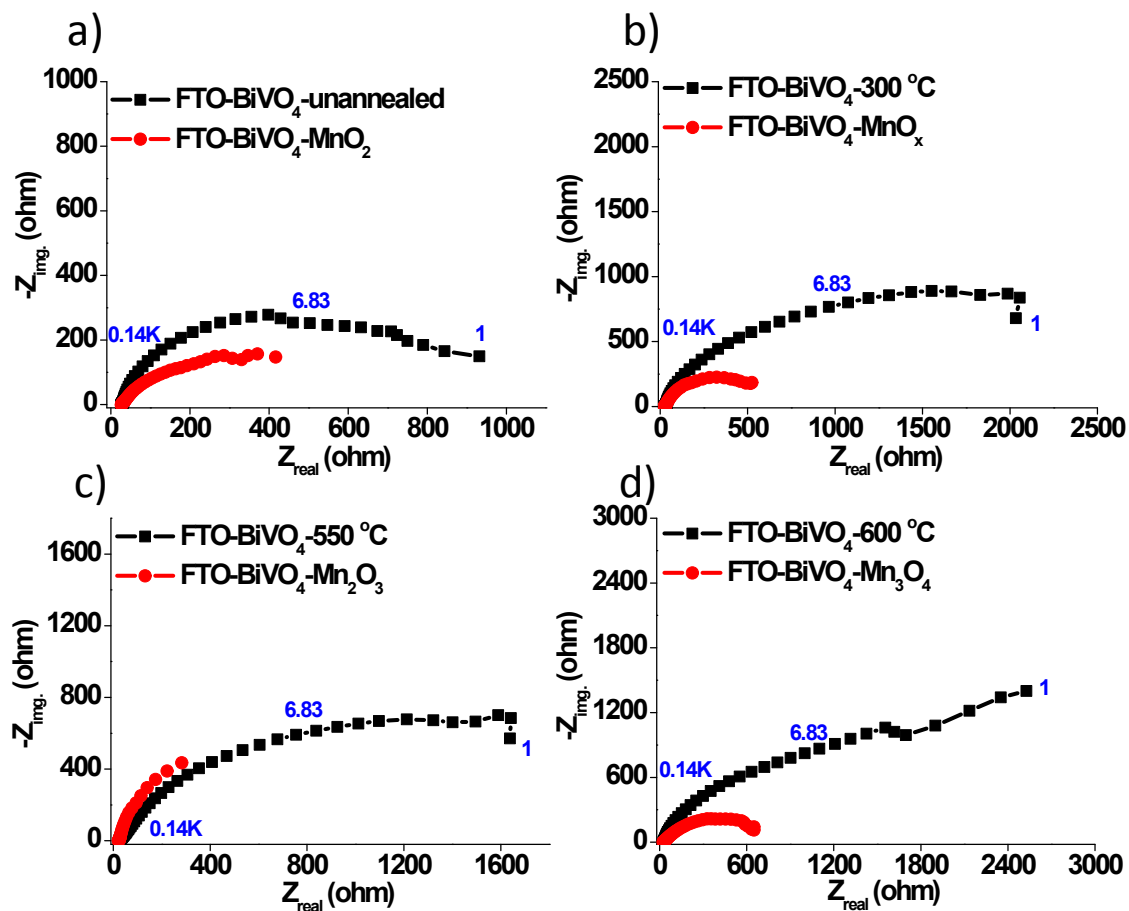

**Fig. S17.** Nyquist plots in full light illumination for a) FTO-BiVO<sub>4</sub>-MnO<sub>2</sub> compared with unannealed BiVO<sub>4</sub> b) FTO-BiVO<sub>4</sub>-MnO<sub>x</sub> compared with BiVO<sub>4</sub> annealed at 300 °C c) FTO-BiVO<sub>4</sub>-Mn<sub>2</sub>O<sub>3</sub> compared with BiVO<sub>4</sub> annealed at 550 °C d) FTO-BiVO<sub>4</sub>-Mn<sub>3</sub>O<sub>4</sub> compared with BiVO<sub>4</sub> annealed at 600 °C under visible light illumination of 100 mW/cm<sup>2</sup> in 0.1 M Potassium phosphate (KPi) buffer solution (pH=7), the numerical values (blue font) in the plots represent the respective frequencies of the three data points above/below them.

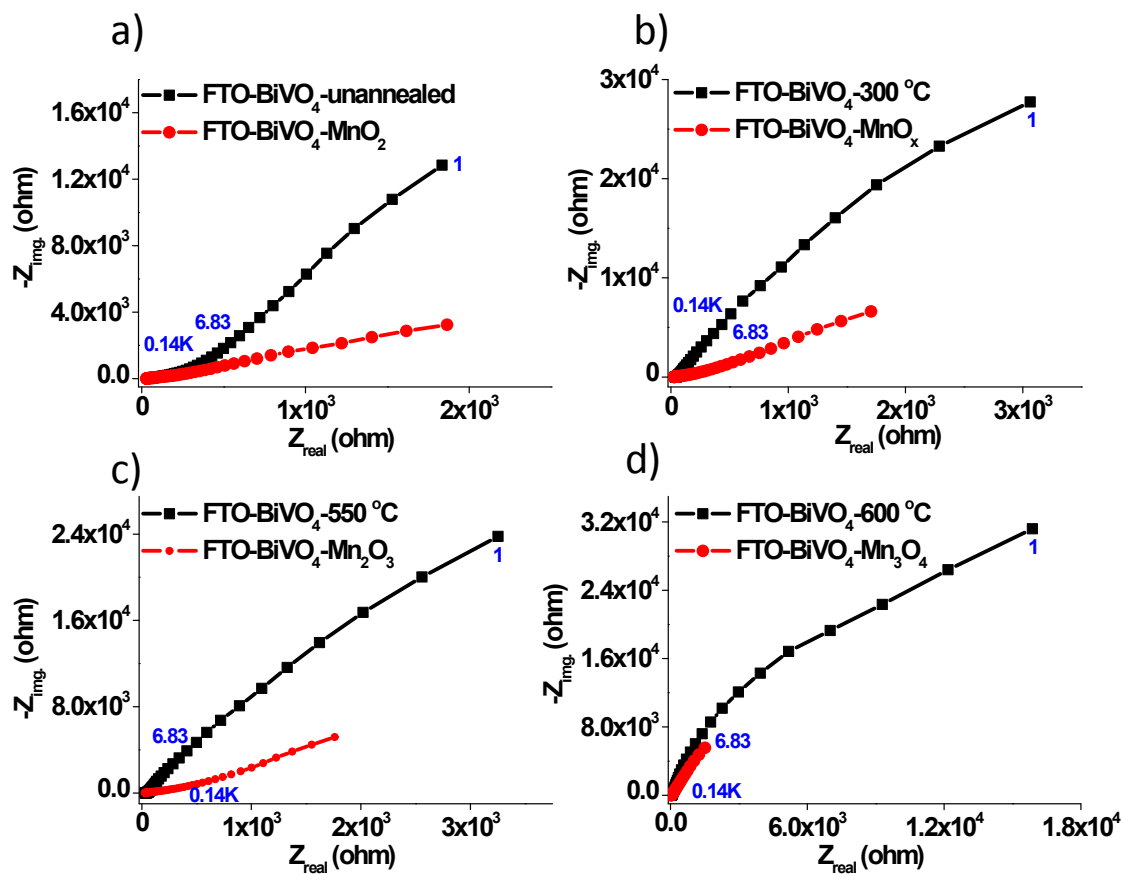

**Fig. S18.** Nyquist plots in dark for e) FTO-BiVO<sub>4</sub>-MnO<sub>2</sub> compared with unannealed BiVO<sub>4</sub> f) FTO-BiVO<sub>4</sub>-MnO<sub>x</sub> compared with BiVO<sub>4</sub> annealed at 300 °C g) FTO-BiVO<sub>4</sub>-Mn<sub>2</sub>O<sub>3</sub> compared with BiVO<sub>4</sub> annealed at 550 °C h) FTO-BiVO<sub>4</sub>-Mn<sub>3</sub>O<sub>4</sub> compared with BiVO<sub>4</sub> annealed at 600 °C in 0.1 M Potassium phosphate (KPi) buffer solution (pH=7), the numerical values (blue font) in the plots represent the respective frequencies of the three data points above/below them.

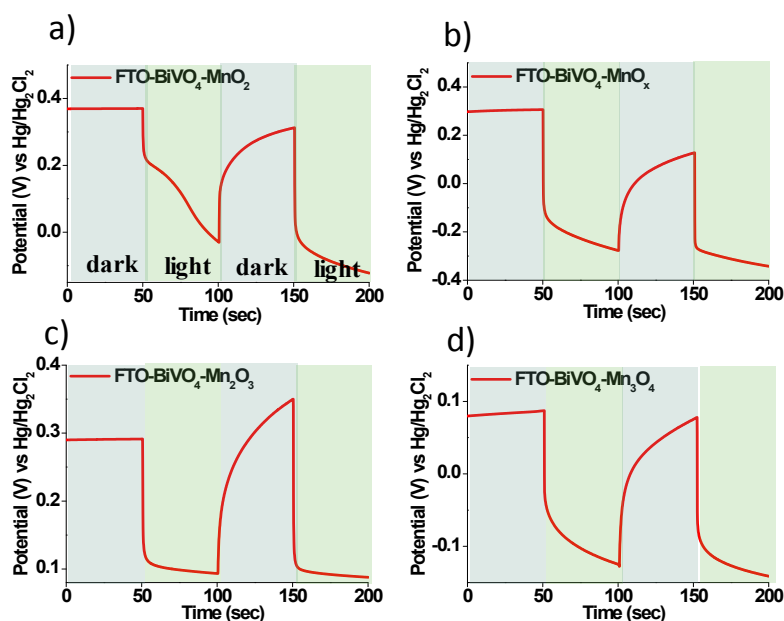

**Fig. S19.** Open circuit potential (ocp) vs time plots for consecutive light and dark illumination for c) FTO-BiVO<sub>4</sub>-MnO<sub>2</sub> d) FTO-BiVO<sub>4</sub>-MnO<sub>x</sub> e) FTO-BiVO<sub>4</sub>-Mn<sub>2</sub>O<sub>3</sub> f) FTO-BiVO<sub>4</sub>-Mn<sub>3</sub>O<sub>4</sub> under visible light illumination of 100 mW/cm<sup>2</sup> in 0.1 M Potassium phosphate (KPi) buffer solution (pH=7).

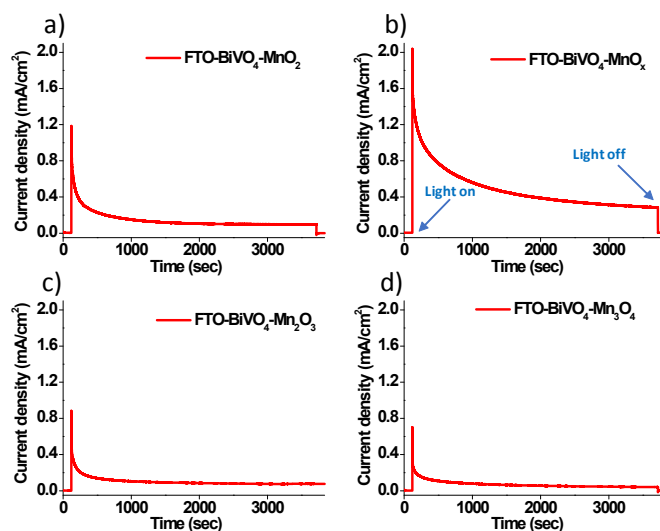

**Fig. S20.** Current Density (J) vs t plots showing stability of a) FTO-BiVO<sub>4</sub>-MnO<sub>2</sub> b) FTO-BiVO<sub>4</sub>-MnO<sub>x</sub> c) FTO-BiVO<sub>4</sub>-Mn<sub>2</sub>O<sub>3</sub> d) FTO-BiVO<sub>4</sub>-Mn<sub>3</sub>O<sub>4</sub> under visible light illumination of 100 mW/cm<sup>2</sup> in 0.1 M Potassium phosphate (KPi) buffer solution (pH=7). Light was switched on 120 sec after illumination and switched off 120 sec before the analysis time is over.

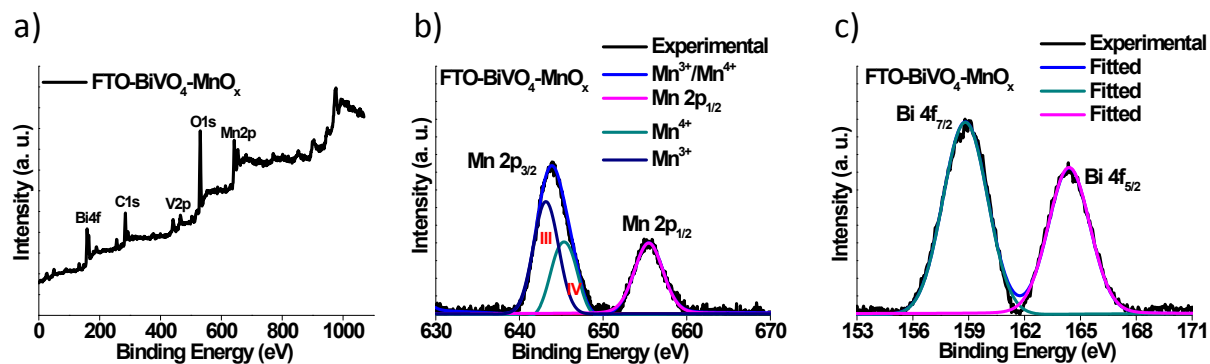

**Fig. S21.** X-ray photoelectron spectra for FTO-BiVO<sub>4</sub>-MnO<sub>x</sub> a) survey scan b) deconvoluted peaks of Mn 2p<sub>3/2</sub> and Mn 2p<sub>1/2</sub> c) deconvoluted peaks of Bi 4f<sub>7/2</sub> and Bi 4f<sub>5/2</sub>.

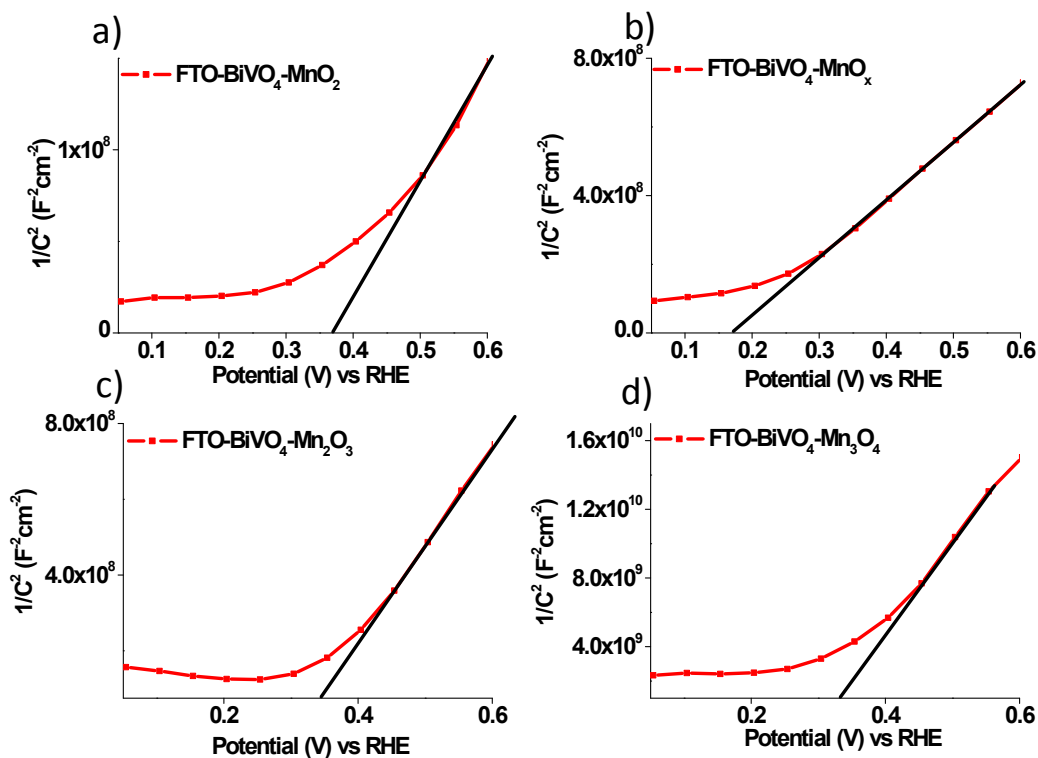

**Fig. S22.** Mott-Schottky plots for full light illumination for a) FTO-BiVO<sub>4</sub>-MnO<sub>2</sub> b) FTO-BiVO<sub>4</sub>-MnO<sub>x</sub> c) FTO-BiVO<sub>4</sub>-Mn<sub>2</sub>O<sub>3</sub> d) FTO-BiVO<sub>4</sub>-Mn<sub>3</sub>O<sub>4</sub> under visible light illumination of 100 mW/cm<sup>2</sup> in 0.1 M Potassium phosphate (KPi) buffer solution (pH=7).



**Table S3:** Calculations for Flat band potential for photoanodes:

| <b>Photoelectrode</b>                                   | <b>Intercept (V)</b>           | <b>Flat band potential (V<sub>fb</sub>)</b> |
|---------------------------------------------------------|--------------------------------|---------------------------------------------|
| <b>FTO-BiVO<sub>4</sub>-MnO<sub>2</sub></b>             | <b>-2.36 x 10<sup>8</sup></b>  | <b>0.34</b>                                 |
| <b>FTO-BiVO<sub>4</sub>-MnO<sub>x</sub></b>             | <b>-2.89 x 10<sup>8</sup></b>  | <b>0.14</b>                                 |
| <b>FTO-BiVO<sub>4</sub>-Mn<sub>2</sub>O<sub>3</sub></b> | <b>-8.15 x 10<sup>8</sup></b>  | <b>0.32</b>                                 |
| <b>FTO-BiVO<sub>4</sub>-Mn<sub>3</sub>O<sub>4</sub></b> | <b>-1.66 x 10<sup>10</sup></b> | <b>0.30</b>                                 |

## References

<sup>1</sup> T. Gao, H. Fjellvåga and P. Norby, *Analytica Chimica Acta*, 2009, **648**, 235.

<sup>2</sup> R. Naem, M. A. Ehsan, R. Yahya, M. Sohail, H. Khaledic and M. Mazhar, *Dalton Trans.*, 2016, **45**, 14928.

<sup>3</sup> C. Julien, M. Massot, C. Poinignon, *Spectrochim. Acta Part A: Mol. Biomol. Spectrosc.*, 2004, **60**, 689.

<sup>4</sup> S. Chenga, L. Yanga, D. Chenb, X. Jic, Z. Jianga, D. Dingb, M. Liu, *Nano Energy*, 2014, **9**, 161.

<sup>5</sup> S. R. M. Thalluri, C. Martinez-Suarez, A. Virga, N. Russo and G. Saracco, *Int. J. Chem. Eng.*, 2013, **4**, 305.

<sup>6</sup> W. Li, X. Cui, R. Zeng, G. Du, Z. Sun, R. Zheng, S. P. Ringer and S. X. Dou, *Sci. Rep.*, 2015, **5**, Article no. 8987.

<sup>7</sup> R. Naem, M. A. Ehsan, R. Yahya, M. Sohail, H. Khaledic and M. Mazhar, *Dalton Trans.*, 2016, **45**, 14928.

<sup>8</sup> a) H. Rahaman and S. K. Ghosh, *RSC Adv.*, 2016, **6**, 4531 b) A. Giri, N. Goswami, C. Sasmal, N. Polley, D. Majumdar, S. Sarkar, S. N. Bandyopadhyay, A. Singha and S. K. Pal, *RSC Adv.*, 2014, **4**, 5075 c) A. Vazquez-olmos, R. Redon, A. L. Fernandez-osorio and J. M. Saniger, *Appl. Phys. A*, 2005, **81**, 1131.
